# Supplementary material
Source: PubMed Central journal article supplement (PMC3850204)
Supplement: supp_pp.113.225649_225649suppl_data.pdf [file supp_pp.113.225649_225649suppl_data.pdf]

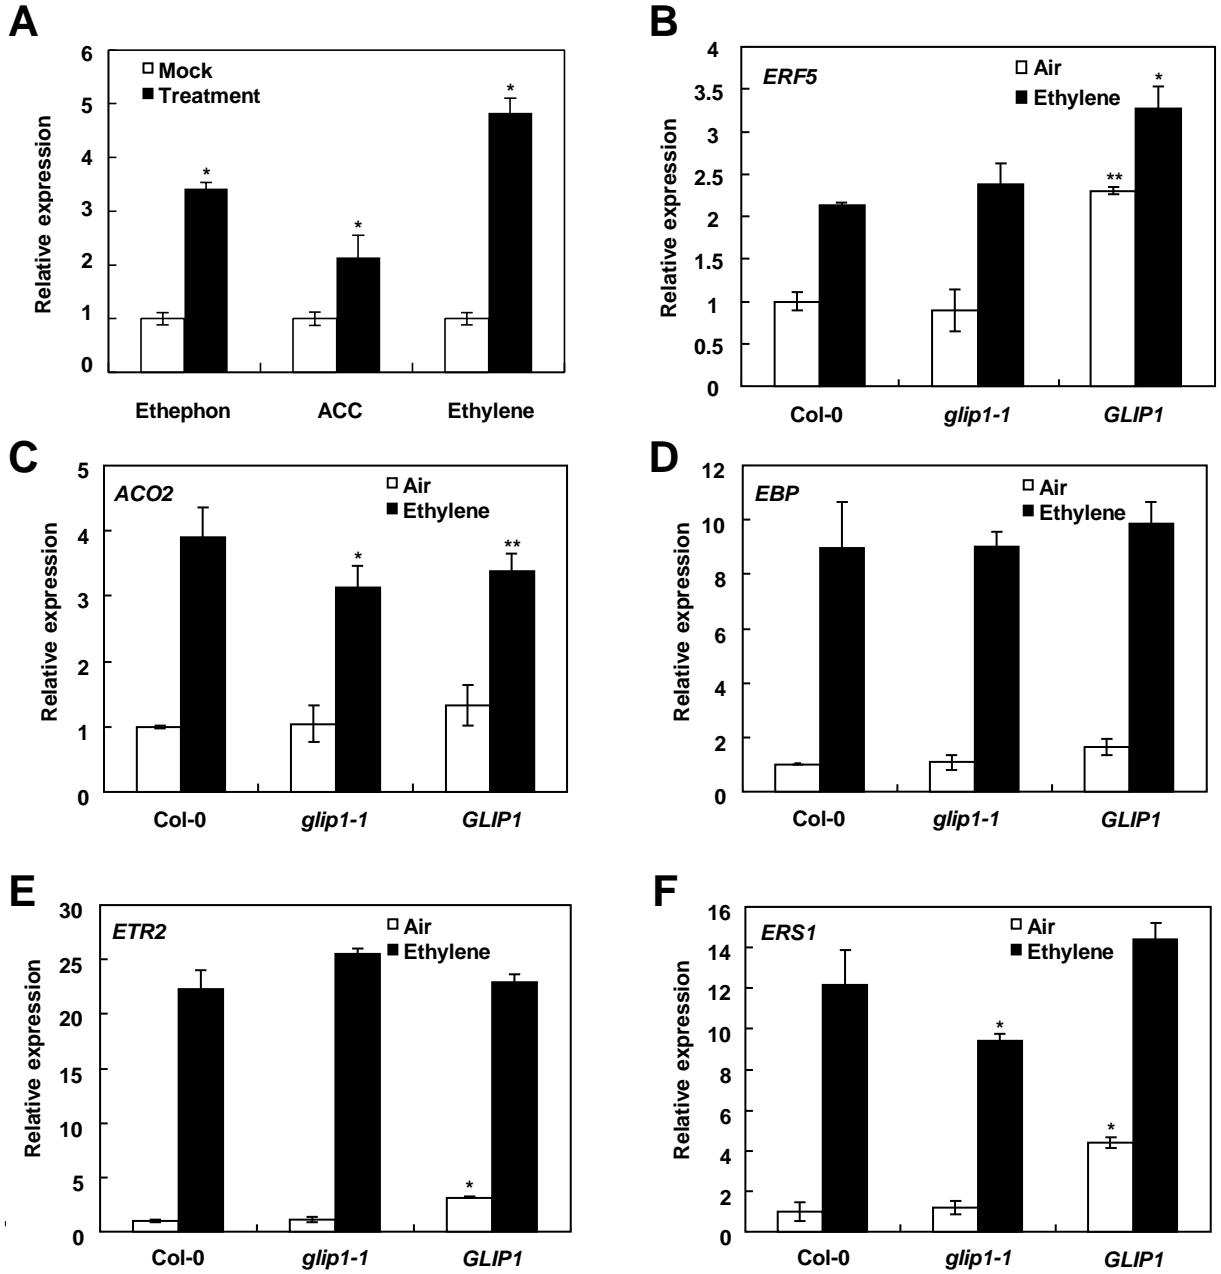

**Supplemental Figure S1.** Expression analysis of ethylene-responsive genes in Col-0, *glip1-1*, and *35S:GLIPI* plants. A, Expression analysis of *GLIPI* in response to ethephon, ACC, and ethylene. Four-week-old plants were mock-treated or treated with 1.5 mM ethephon, 10  $\mu$ M ACC, and 10 ppm ethylene for 12 h. The values represent means  $\pm$  SD from 3 independent experiments. Asterisks indicate significant differences from the mock-treated Col-0 (*t* test; \**P* < 0.05). B to F, Expression analysis of ethylene-responsive genes *ERF5*, *ACO2*, *EBP*, *ETR2*, and *ERS1* in Col-0, *glip1-1*, and *35S:GLIPI* plants. Four-week-old plants were treated with air or 10 ppm ethylene for 12 h. The values represent means  $\pm$  SD from 3 independent experiments. Asterisks indicate significant differences from the respective Col-0 (*t* test; \**P* < 0.05; \*\**P* < 0.01).

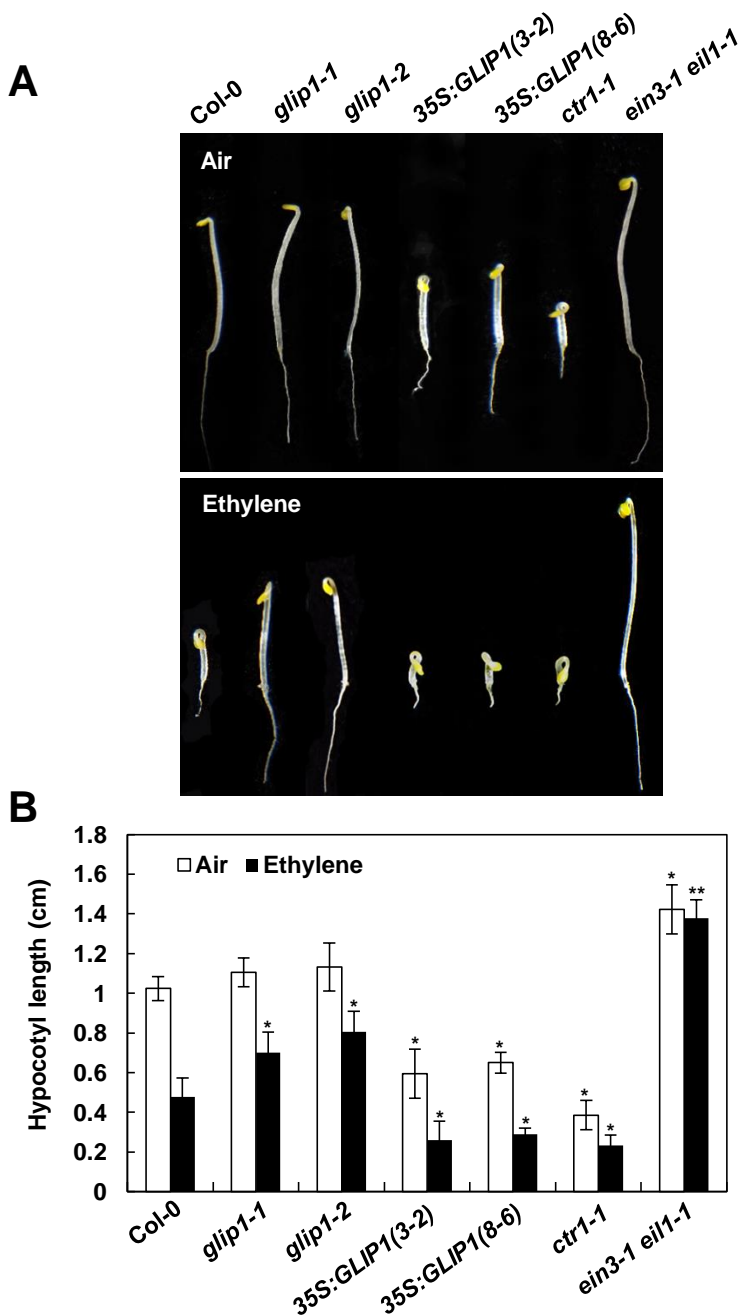

**Supplemental Figure S2.** Triple response of *glip1* mutants and homozygous T<sub>3</sub> lines of *35S:GLIP1*. A, Triple response phenotypes of 4-day-old etiolated seedlings of Col-0, *glip1-1*, *glip1-2*, *35S:GLIP1(3-2)* and *35S:GLIP1(8-6)*. Seedlings were grown in air or 10 ppm ethylene. B, Hypocotyl lengths of plants in A. The values are means  $\pm$  SD ( $n = 20$ ). Asterisks indicate significant differences from the respective Col-0 ( $t$  test; \* $P < 0.05$ ; \*\* $P < 0.01$ ).

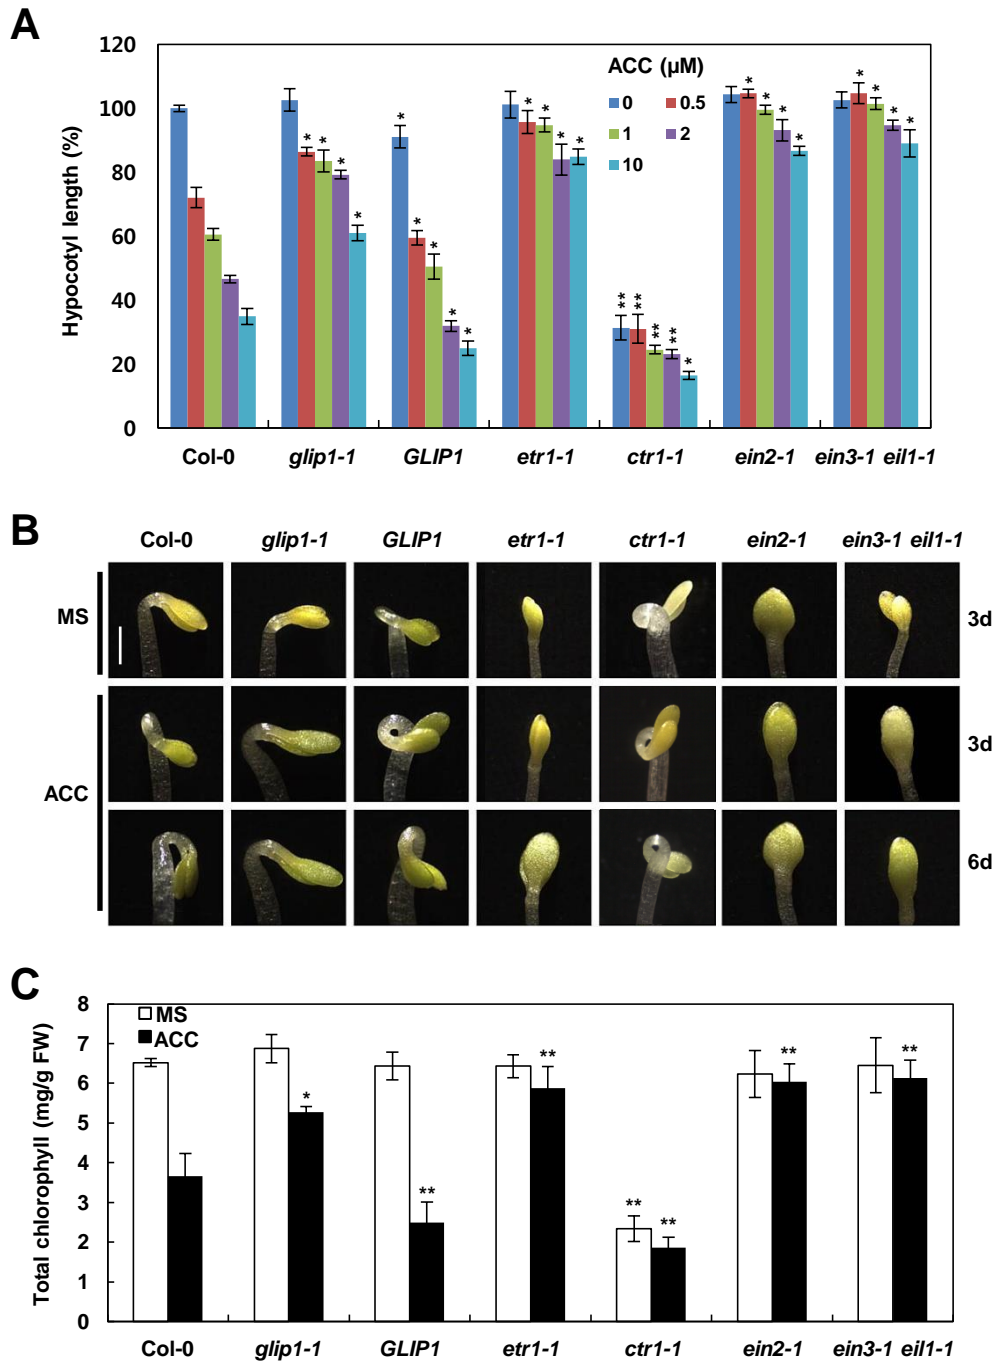

**Supplemental Figure S3.** Positive regulation of ethylene responses by GLIP1. A, Hypocotyl lengths of 4-day-old etiolated seedlings of Col-0, *glip1-1*, *35S:GLIP1*, and ethylene mutants grown in the presence of different concentrations of ACC. The values are means  $\pm$  SD ( $n = 20$ ). Asterisks indicate significant differences from the respective Col-0 ( $t$  test;  $*P < 0.05$ ;  $**P < 0.01$ ). B, Apical hook curvature of 3- and 6-day-old etiolated seedlings grown on MS media alone or supplemented with 10  $\mu$ M ACC. C, Chlorophyll contents of Col-0, *glip1-1*, *35S:GLIP1*, and ethylene mutants. Plants were grown on MS media alone or supplemented with 10  $\mu$ M ACC for 10 days under long-day conditions. The values are means  $\pm$  SD ( $n = 10$ ). Asterisks indicate significant differences from the respective Col-0 ( $t$  test;  $*P < 0.05$ ;  $**P < 0.01$ ). The experiment was repeated 3 times with similar results.

**A**

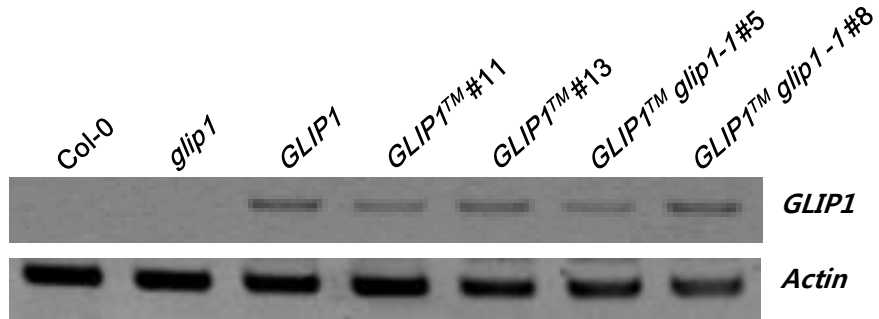

**B**

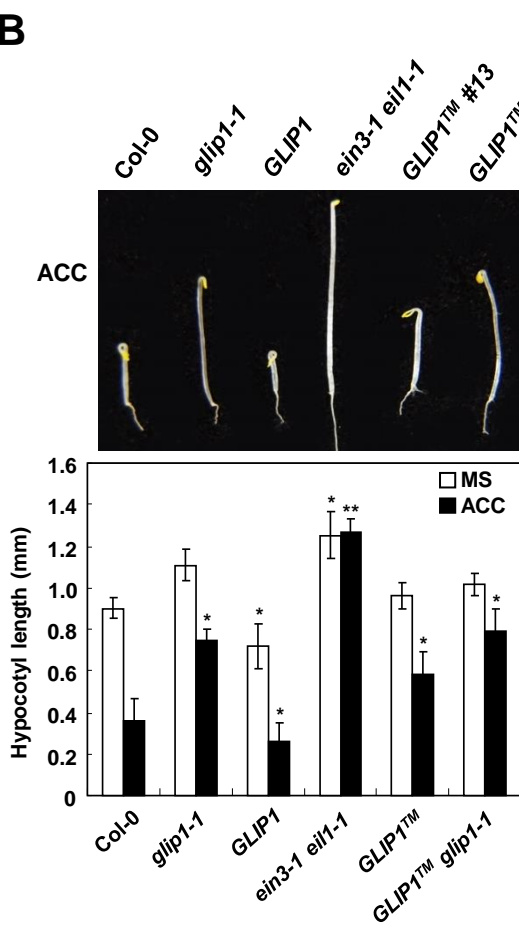

**C**

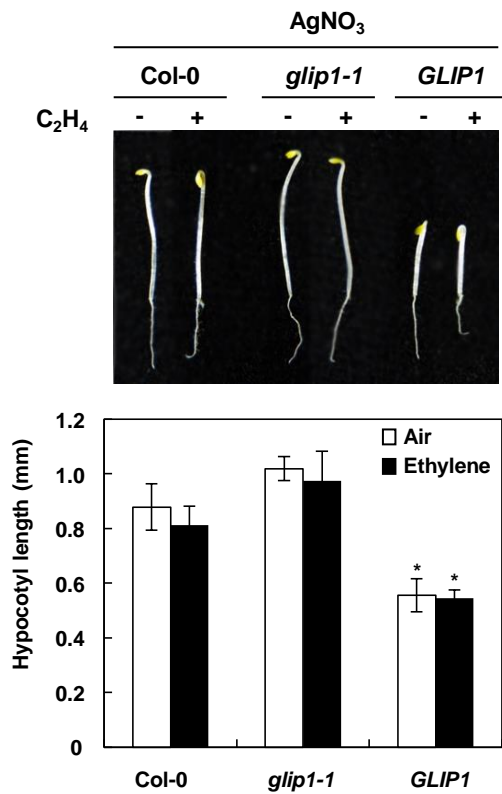

**Supplemental Figure S4.** Effects of catalytic mutation of *GLIP1* and Ag<sup>2+</sup> on the triple response of *glip1-1* and *35S:GLIP1* seedlings. A, Expression analysis of *GLIP1* in Col-0, *glip1-1*, *35S:GLIP1*, and inactive *GLIP1* mutants *GLIP1<sup>TM</sup>* and *GLIP1<sup>TM</sup> glip1-1* plants. B, Triple response phenotypes (top) and hypocotyl lengths (bottom) of 4-day-old etiolated seedlings of Col-0, *glip1-1*, *35S:GLIP1*, *GLIP1<sup>TM</sup>*, and *GLIP1<sup>TM</sup> glip1-1* in the presence of 10 μM ACC. C, Triple response phenotypes (top) and hypocotyl lengths (bottom) of *glip1-1* and *35S:GLIP1* seedlings in the presence of Ag<sup>2+</sup>. Seedlings were grown on 100 μM AgNO<sub>3</sub>-containing MS media in air or 10 ppm ethylene for 4 days in the dark. The values are means ± SD (*n* = 10). Asterisks indicate significant differences from the respective Col-0 (*t* test; \**P* < 0.05; \*\**P* < 0.01).

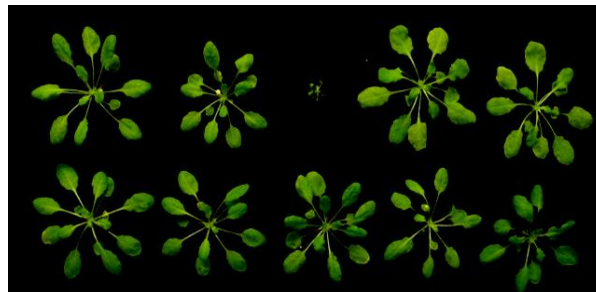

|                     |                                       |                                       |                                       |                                                         |
|---------------------|---------------------------------------|---------------------------------------|---------------------------------------|---------------------------------------------------------|
| <b>Col-0</b>        | <b><i>etr1-1</i></b>                  | <b><i>ctr1-1</i></b>                  | <b><i>ein2-1</i></b>                  | <b><i>ein3-1</i><br/><i>eil1-1</i></b>                  |
| <b><i>GLIP1</i></b> | <b><i>GLIP1</i><br/><i>etr1-1</i></b> | <b><i>GLIP1</i><br/><i>ctr1-1</i></b> | <b><i>GLIP1</i><br/><i>ein2-1</i></b> | <b><i>GLIP1</i><br/><i>ein3-1</i><br/><i>eil1-1</i></b> |

**Supplemental Figure S5.** Genetic crosses between *35S:GLIP1* and ethylene mutants. Growth phenotypes (top) of Col-0, *35S:GLIP1*, ethylene mutants, and crossed lines (indicated at bottom) grown in soil for 4 weeks under long-day conditions.



**A**

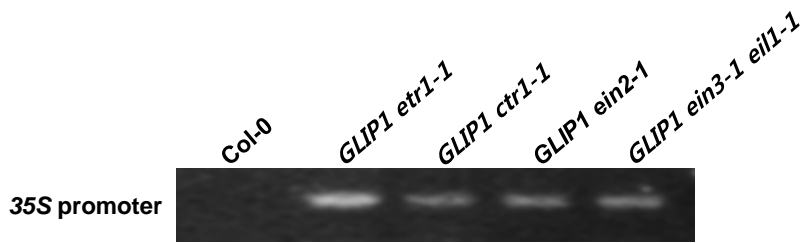

**B**

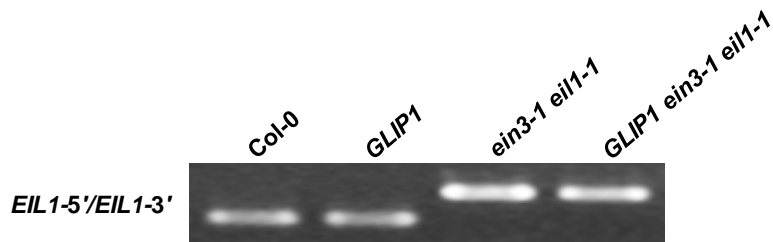

**C**

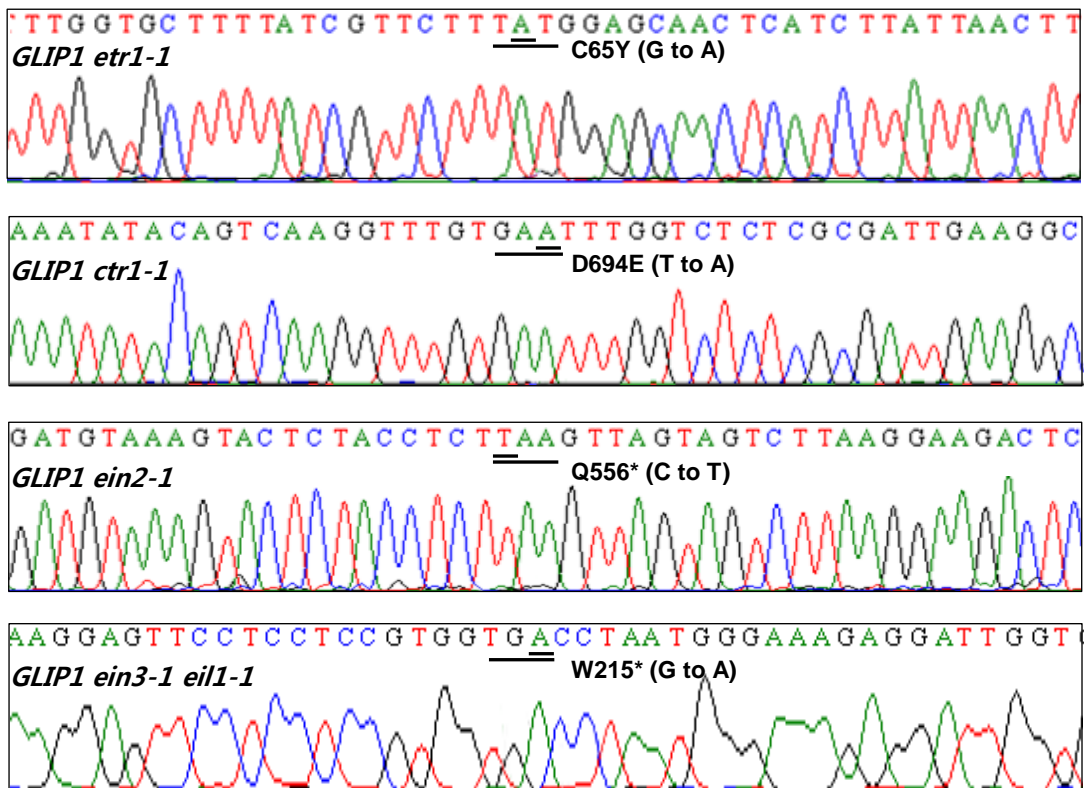

**Supplemental Figure S6.** Genomic DNA analysis of crossed lines. A, PCR analysis for detection of 35S promoter in Col-0 and homozygous crossed lines. B, PCR-based genotyping of transposon insertion within the *EIL1* gene in Col-0, *35S:GLIP1*, *ein3-1 eil1-1*, and *35S:GLIP1 ein3-1 eil1-1* plants. *eil1-1* contains a transposon insertion, and the PCR band is ~200 bp larger than that of Col-0. C, DNA sequencing evidence for point mutations in crossed lines. Total genomic DNA was extracted from 4-week-old plants. PCR amplification of 500~700 bp target regions was performed using specific primers. PCR products were purified and sequenced. The black bars on top of the chromatograms mark mutation sites: *etr1-1*, C65Y substitution; *ctr1-1*, D694E substitution; *ein2-1*, Q556\* substitution; *ein3-1*, W215\* substitution.

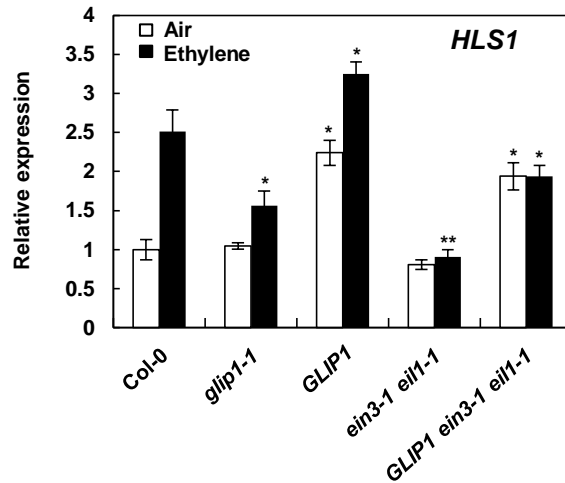

**Supplemental Figure S7.** Expression analysis of *HLS1* in Col-0, *glip1-1*, *35S:GLIP1*, *ein3-1 eil1-1*, and *35S:GLIP1 ein3-1 eil1-1* plants. Four-week-old plants were treated with air or 10 ppm ethylene for 12 h. The values represent means  $\pm$  SD from 3 independent experiments. Asterisks indicate significant differences from the respective Col-0 (*t* test; \* $P < 0.05$ ; \*\* $P < 0.01$ ).

**A**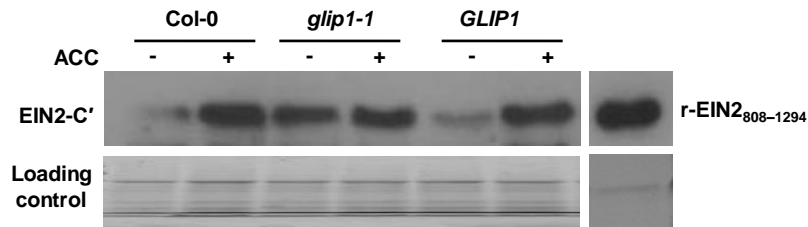**B**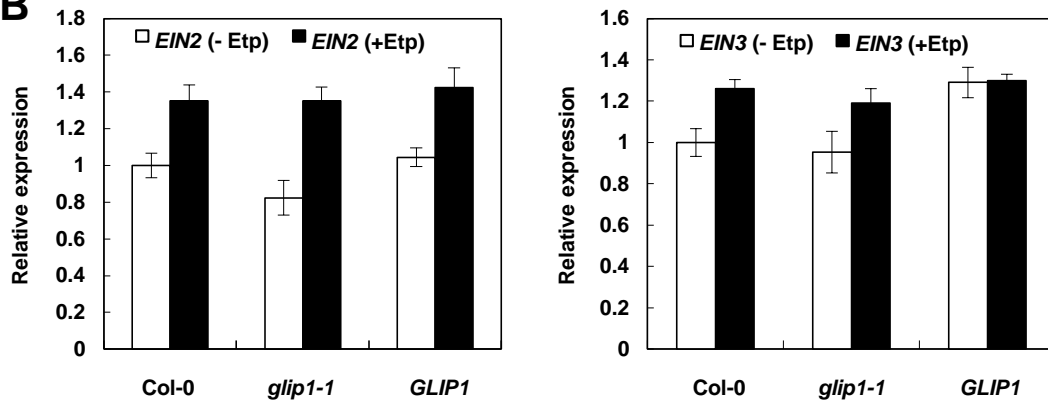

**Supplemental Figure S8.** Expression analysis of EIN2 proteins, and *EIN2* and *EIN3* transcripts in Col-0, *glip1-1*, and *35S:GLIP1* plants. A, Immunoblot analysis of EIN2. Total protein extracts (10-30 μg) of 10-day-old seedlings untreated or treated with 10 μM ACC for 4 h were separated by SDS gel electrophoresis, and subjected to Coomassie staining (bottom) and Western blot analysis with anti-EIN2 antibody (top). EIN2-C', C-terminal EIN2 fragment; r-EIN2<sub>808-1294</sub>, recombinant EIN2 (residues 800-1294). B, Expression analysis of *EIN2* and *EIN3*. Four-week-old plants were treated with water (mock) or 1.5 mM ethephon for 24 h. The values represent means ± SD from 3 independent experiments. Etp, ethephon.

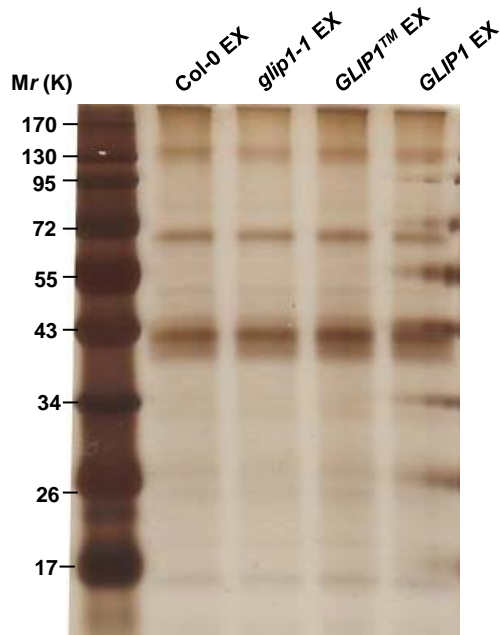

**Supplemental Figure S9.** Proteins isolated from petiole exudates of Col-0, *glip1-1*, *35S:GLIP1<sup>TM</sup>*, and *35S:GLIP1* plants. Proteins were separated by SDS-gel electrophoresis and visualized by silver staining.

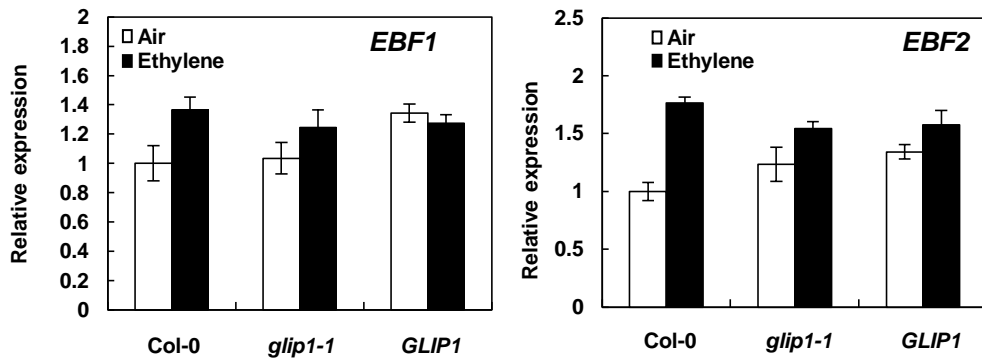

**Supplemental Figure S10.** Expression analysis of *EBF1* and *EBF2* in Col-0, *glip1-1*, and *35S:GLIP1* plants. Four-week-old plants were treated with air or 10 ppm ethylene for 12 h. The values represent means  $\pm$  SD from 3 independent experiments.

**Supplemental Table SI.** *List of primers used for PCR and qRT-PCR*

| Gene name          | Oligonucleotide (5'-3')     |
|--------------------|-----------------------------|
| <i>ETR1</i> -5'    | GCTTCAACGCTCCCCTTTTCTCC     |
| <i>ETR1</i> -3'    | CATCCGCTGGCCATTGCGGTTT      |
| <i>ETR1</i> -(seq) | GATTGTCTACGCTACGTTCTCG      |
| <i>CTR1</i> -5'    | GAGAGACGTGCCTGAGTATGG       |
| <i>CTR1</i> -3'    | GACAGCTTGAGGCTGCTGTATC      |
| <i>CTR1</i> -(seq) | GTGATTACTTCCTGATCTTGGTG     |
| <i>EIN3</i> -5'    | GTCTAGAGCTCAAGATGGGATC      |
| <i>EIN3</i> -3'    | CTCTAGCCAAGGACTCTTCTTGG     |
| <i>EIN3</i> -(seq) | GGGAGTGGTGGAAAGATAAGG       |
| <i>EIN2</i> -5'    | GGTTTGAGATGGAATACCGTGATGG   |
| <i>EIN2</i> -3'    | TCAAGGATGGCAGATAAGTGTCTCC   |
| <i>EIN2</i> -(seq) | ATGCTCAAATGCTTTATCTTATCCATC |
| <i>EIL1</i> -5'    | GGGAATGGTGGAAAGATAAG        |
| <i>EIL1</i> -3'    | CTTTCGCCGTCATCTTATCC        |
| 35S promoter-5'    | GAGACTTTCAACAAAGGGTAA       |
| 35S promoter-3'    | CAAATGAAATGAACTCCTTAT       |
| <i>ERF1</i> -5'    | GAGGAAACACTCGATGAGACG       |
| <i>ERF1</i> -3'    | GGAGCGGTGATCAAAGTCAC        |
| <i>ERF5</i> -5'    | TGGFAGAGACGTTTCCGTTTG       |
| <i>ERF5</i> -3'    | TGAGGAGATAACGGCGACAG        |
| <i>SID2</i> -5'    | GAGACTTACGAAGGAAGATGATGAG   |
| <i>SID2</i> -3'    | TGATCCCGACTGCAAATTCACTCTC   |
| <i>b-CHI</i> -5'   | TTACGGTCTATGCGGTAG          |
| <i>b-CHI</i> -3'   | GAGGCCGTTAACGAAGG           |
| <i>GLIP1</i> -5'   | GGTTTGAGACGGCTAAATC         |
| <i>GLIP1</i> -3'   | GTTCAAACAGCGCTTTGAG         |
| <i>PDF1.2</i> -5'  | GCTAAGTTTGCTTCCATCATCACC    |
| <i>PDF1.2</i> -3'  | AACATGGGACGTAACAGATACACAC   |
| <i>HLS1</i> -5'    | CACGGTTATCAAGTTAGAGC        |
| <i>HLS1</i> -3'    | GAAAGTCCCAAGCGAGA           |
| <i>ACO2</i> -5'    | GTTGGATCTACTGTGTG           |
| <i>ACO</i> -3'     | TCTTCATTGCTGCGAACC          |
| <i>ETR2</i> -5'    | ATCATAGATGGGCTGCTTG         |

|                   |                         |
|-------------------|-------------------------|
| <i>ETR2</i> -3'   | GGATCCATGGACAGATATGG    |
| <i>EBP</i> -5'    | GTGGTGATAAAGCCAAGC      |
| <i>EBP</i> -3'    | CGGACTCATCAAGCTGAC      |
| <i>ERS1</i> -5'   | TCTATCATGAAACCCGAGTC    |
| <i>ERS1</i> -3'   | ACCGTTGCAGATACCAAG      |
| <i>EBF1</i> -5'   | CTGATGTGTCTCTTGCT       |
| <i>EBF1</i> -3'   | GGCACAACTTCCCGAT        |
| <i>EBF2</i> -5'   | GGATCAACCAGTTTGGT       |
| <i>EBF2</i> -3'   | AAGATGCCAAGGCCTTG       |
| <i>ACTIN1</i> -5' | GGTGTCATGGTTGGTATGGGTC  |
| <i>ACTIN1</i> -3' | CCTCTGTGAGTAGAACTGGGTGC |

---
